Running head: ACUTE NASAL DRYNESS IN COVID-19

## Acute nasal dryness in COVID-19

Jordi Navarra (PhD)<sup>1\*</sup>, Alba Ruiz-Ceamanos (MA)<sup>1</sup>, Juan José Moreno (PhD)<sup>2,3</sup>, José María García-Basterrechea (MD)<sup>4</sup>, Josep de Haro-Licer (MD)<sup>5</sup>, Scott Sinnott (PhD)<sup>6</sup>, Charles Spence (PhD)<sup>7</sup>, & David Gallardo-Pujol (PhD)<sup>8,9</sup>

1. Department of Cognition, Development and Educational Psychology, University of Barcelona, Barcelona, Spain
2. Department Nutrition, Food Science and Gastronomy, Institute of Nutrition and Food Safety, University of Barcelona, Barcelona, Spain
3. CIBEROBN Fisiopatología de la Obesidad y Nutrición, Instituto de Salud Carlos III, Spain
4. Department of Internal Medicine, University of Murcia, Murcia, Spain
5. Ear, Nose and Throat Department, Hospital Municipal de Badalona - Badalona Serveis Assistencials (HMB-BSA), Barcelona, Spain
6. Department of Psychology, University of Hawai'i at Manoa, Hawai'i, USA
7. Department of Experimental Psychology, University of Oxford, Oxford, UK
8. Department of Clinical Psychology and Psychobiology, University of Barcelona, Barcelona, Spain
9. Institute of Neurosciences, University of Barcelona, Barcelona, Spain.

### Corresponding author:

Jordi Navarra

Department of Cognition, Development and Educational Psychology

University of Barcelona, Spain

Faculty of Psychology, Passeig de la Vall d'Hebron, 171, 08035, Barcelona, Spain.

Phone: +34 933125140

E-mail: [jordi.navarra@ub.edu](mailto:jordi.navarra@ub.edu)

**Keywords:** COVID-19, nasal dryness, olfaction, goblet cells, ACE-2 receptors.

Running head: ACUTE NASAL DRYNESS IN COVID-19

1  
2  
3  
4  
5  
6  
7  
8  
9  
10  
11  
12  
13  
14  
15  
16  
17  
18  
19  
20  
21  
22  
23  
24  
25

## Abstract

One of the entry routes of SARS-CoV-2 is the nasal epithelium. Although mounting evidence suggests the presence of olfactory dysfunction, and even anosmia, in patients with COVID-19, it is not clear whether these patients also suffer from other “nasal” symptoms that may influence their olfaction. A group of 35 patients with COVID-19 (and a control group matched in gender and age) were surveyed about the presence of a variety of nasal symptoms that may be associated to drastic perturbations experienced in the nasal cavity (e.g., “excessive dryness” and/or a continual sensation of having had a “nasal douche”). We used a cross-sectional, retrospective survey, targeted at the general population by means of non-quoted, non-random, snowball sampling. Symptoms were assessed with absence/presence responses. The possible association between two continuously distributed latent variables from categorical variables was estimated by means of polychoric correlations. More than 68% of the patients reported at least one “nasal” symptom. The clinical group also experienced “a strange sensation in the nose” and having excessive nasal dryness significantly more often than the control group. Fifty-two percent of the patients (but only 3% of the control group) reported a constant sensation of having had a strong nasal douche. Nasal symptoms predominantly co-occurred with anosmia/hyposmia, and ageusia/hypogeusia, appeared principally before or during the other symptoms of COVID-19, and lasted for twelve days, in average. The presence of these nasal symptoms, and their early occurrence, could potentially facilitate early diagnosis of COVID-19 and initial social distancing efforts.

Running head: ACUTE NASAL DRYNESS IN COVID-19

## 26 **Introduction**

27 In 2020, a new disease, known as COVID-19, caused by an infection of SARS-CoV-2,  
28 has spread globally. Given the high percentage of patients with COVID-19 who are  
29 asymptomatic or experience only mild symptoms (Kim et al., 2020), the need to identify  
30 (and isolate if necessary) possible carriers of the SARS-CoV-2 virus quickly and  
31 inexpensively is crucial to helping reduce its spread. Recognizing and understanding all  
32 of the possible symptomatic manifestations of COVID-19, including those that seem to  
33 be less life-threatening, can be relevant for diagnostic, treatment, and mitigation efforts  
34 (e.g., social distancing), especially in situations where RT-PCR tests cannot be  
35 administered to all non-severe cases. Along these lines, we now know, for example, that  
36 approximately 80% of COVID-19 patients in Europe report some loss of smell and taste  
37 (Lechien, Chiesa-Estomba, De Siati, 2020; see also Moein, Hashemian, Mansourafshar,  
38 Khorram-Tousi, Tabarsi, and Doty, 2020).

39 Evidence suggests that the virus adheres to angiotensin-converting enzyme 2 (ACE-2)  
40 receptors in epithelial cells (Wan, Shang, Graham, Baric, and Li, 2020). Clear  
41 symptomatic manifestations (e.g., loss of smell; see Brann, Tsukahara, and Weinreb,  
42 2020; Lechien et al., 2020; Moein et al., 2020; Spinato, Fabbris, and Polesel, 2020)  
43 associated with damage in nasal (Sungnak et al., 2020; Ziegler, Allon, and Nyquist,  
44 2020), and/or brain cells (Baig, Khaleeq, Ali, and Syeda, 2020; Mao et al., 2020)  
45 expressing ACE-2 have been identified. Goblet cells have recently been shown to  
46 harbor ACE-2 proteins (e.g., Ziegler et al., 2020). These epithelial cells are responsible  
47 for the production of the mucus in respiratory, reproductive, and intestinal tracts. Recent  
48 evidence also points to the presence of goblet secretory cells with ACE-2 membrane  
49 proteins in the respiratory nasal epithelium (e.g., Sungnak et al., 2020). A possible  
50 disruption in the mucus production by the action of SARS-CoV-2 on these cells may

Running head: ACUTE NASAL DRYNESS IN COVID-19

51 imply a drastic change of the mucosa environment. As sudden changes in mucus density  
52 could compromise the final adherence of the volatile chemical compounds to their  
53 corresponding odorant receptors, olfaction may possibly be compromised in the process  
54 (Hummel, Whitcroft, and Andrews, 2016).

55 Most important for our purpose, an ostensible reduction of mucus could certainly lead  
56 to strange sensations in the nasal cavity (Hildenbrand, Weber, Brehmer, 2011). If  
57 patients with COVID-19 do experience odd, and even unprecedented sensations in their  
58 nasal cavity, we might be observing yet another warning sign of COVID-19 that has  
59 been ignored so far, probably due to its being overshadowed by more severe symptoms  
60 needing urgent intervention.

61 The goal of the present study was to obtain diagnostic-valuable data regarding the  
62 presence of these non-olfactory nasal symptoms in patients with COVID-19. The study  
63 was conceived as a cross-sectional, retrospective survey targeted to the general  
64 population by means of non-quoted, non-random, snowball sampling. A brief online  
65 survey gauged whether participants had noticed any strange sensations in their  
66 nose/nasal cavity or not. More specifically, questions addressed if they felt dryness in  
67 their nasal cavity or had perceived the continuous feeling of having had a nasal douche.  
68 Information regarding the time of appearance of these symptoms relative to other  
69 COVID-19 symptoms was also gathered.

70

## 71 **Materials and Methods**

72 The study was approved by the University of Barcelona's Bioethics Commission  
73 (CBUB) and followed the Declaration of Helsinki ethical standards and the Spanish and  
74 EU data protection regulations. Written informed consent was obtained prior to  
75 participation in the survey.

Running head: ACUTE NASAL DRYNESS IN COVID-19

76 Data Collection

77 Information regarding the presence/absence of non-olfactory nasal symptoms, as well as  
78 regarding the presence/absence of other symptoms previously described in the literature  
79 (e.g., fever, cough, smell and taste loss, etc.), was obtained from a group of patients  
80 with COVID-19 and a control group.

81 Data were collected by means of an online (Qualtrics) survey, which was designed to:  
82 1) capture the main demographics of respondents, 2) ask whether they were COVID-  
83 tested or COVID-suspected (as suspicion without a PCR test result was considered an  
84 exclusion criterion), and 3) collect information about COVID-19 symptoms.

85 The survey questionnaire comprised a total of 69 items in four different languages  
86 (Catalan, Spanish, Italian, and French) and were administered depending on the  
87 participants' responses (i.e., some questions appeared only in cases where a specific  
88 response to a particular item was provided by the participant). Snowball sampling was  
89 used to recruit the sample of participants (Goodman, 1961).

90 Participants

91 Only those participants who provided a copy of their positive result for SARS-CoV-2 in  
92 a PCR test were included in the patient group. The survey was conducted from  
93 03/30/2020 to 04/06/2020 and a total of 414 people took part.

94 The vast majority of respondents were from Spain (86%), followed by Italy (9%) and  
95 France (1.5%). Responses from the survey were used to classify respondents as either  
96 patients (with demonstrable positive results in a PCR test), controls, or those with an  
97 uncertain status. Data from the latter were removed from the analyses.

98 The clinical group of patients with confirmed positive RT-PCR test results included 35  
99 participants (24 female; range=21-65 years; median age=47 years; interquartile range  
100 (IQR)= 38.5-53.5 years), and the control group included 156 participants (110 female;

Running head: ACUTE NASAL DRYNESS IN COVID-19

101 range=16-76 years; median age= 31 years; IQR=19-50 years). Because these initial  
102 groups differed in terms of age ( $p<.001$ ) and smoking habits ( $p<.01$ ), only responses  
103 from a sub-sample of 35 healthy volunteers (based on the following formula:  
104  $Group \sim Gender + Age + Smoking$ ) were used for statistical analyses, ensuring that  
105 participants were matched in terms of age (clinical group's median age=47 years,  
106 IQR=38.5-53.5; control group's median age=46 years, IQR=38.5-53.5), and gender (24  
107 vs. 19 female, respectively; see Table 1 for basic demographic information). However,  
108 the groups were not completely matched in terms of smoking habits ( $p=.004$ ), given that  
109 no patients (but 8 participants from the control group) reported smoking. The  
110 distribution of overall symptoms for both groups can be found in Table 2.  
111

**Table 1.** Basic demographics and characteristics of the clinical and control groups.

|                     | <b>Clinical<br/>(N=35)</b> | SD (or %) | <b>Control<br/>(N=35)</b> | SD (or %) |
|---------------------|----------------------------|-----------|---------------------------|-----------|
| Age (yrs)           | 46                         | 11        | 45.9                      | 11        |
| Females             | 24                         | 68.6      | 19                        | 54.3      |
| Smoking prevalence  |                            |           |                           |           |
| No                  | 35                         | 100       | 27                        | 77.1      |
| < 10 cigarettes/day | 0                          | 0         | 6                         | 17.1      |
| >10 cigarettes/day  | 0                          | 0         | 2                         | 5.8       |

112

113 Statistical analyses

114 The statistical software R 4.0 (package e1071) was used to match cases and controls and  
115 to analyze the data. Values are reported as median (IQR). Comparisons of proportions  
116 were assessed using a Fisher's exact 2-tailed test. Differences in the duration of the

Running head: ACUTE NASAL DRYNESS IN COVID-19

117 symptoms were tested with an unpaired 2-tailed Welch's t test, and 95% CIs are  
118 reported. The possible co-occurrence of symptoms was calculated on the basis of  
119 correlations for categorical variables. These correlations were computed via the  
120 "polychoric" function of the psych package using frequencies as input data. The  
121 significance level was set at  $p < .05$ , and uncertainty estimates are given as confidence  
122 intervals.  
123

**Table 2.** Distribution of symptoms in clinical and control participants.

|                         | <b>Clinical<br/>(N=35)</b> | <b>%</b> | <b>Control<br/>(N=35)</b> | <b>%</b> |
|-------------------------|----------------------------|----------|---------------------------|----------|
| Low-grade fever         | 28                         | 82.4     | 2                         | 6.06     |
| Fever                   | 19                         | 55.9     | 0                         | 0.00     |
| Dry cough               | 25                         | 73.5     | 8                         | 24.24    |
| Respiratory difficulty  | 20                         | 58.8     | 1                         | 3.03     |
| Sore throat             | 12                         | 35.3     | 9                         | 27.27    |
| Nasal congestion        | 19                         | 55.9     | 10                        | 30.30    |
| Headache                | 30                         | 88.2     | 11                        | 33.33    |
| Fatigue                 | 33                         | 97.1     | 2                         | 6.06     |
| Diarrhea                | 20                         | 58.8     | 5                         | 15.15    |
| Anosmia                 | 29                         | 85.3     | 1                         | 3.03     |
| Ageusia                 | 27                         | 79.4     | 3                         | 9.09     |
| Some nasal disturbances | 19                         | 55.9     | 4                         | 12.12    |
| Nasal dryness           | 21                         | 61.8     | 5                         | 15.15    |
| Nasal douche            | 17                         | 51.5     | 1                         | 3.03     |

Running head: ACUTE NASAL DRYNESS IN COVID-19

125 **Results**

126 The participants' responses revealed that 68.6% of the patients experienced at least one  
127 of these "nasal" symptoms (Figure 1A). Further analyses showed that the clinical group  
128 reported having experienced excessive nasal dryness significantly more often than the  
129 control group (21 (61.8%) vs. 5 (15%); odds ratio, 8.7; 95% CI, 2.5-36.5  $p<.001$ ; see  
130 Figure 1B). Similarly, the clinical group also differed statistically from the control  
131 group in terms of having "strange nasal sensations" (19 (55.9%) vs. 4 (12%); odds ratio,  
132 37.2, 95% CI, 5-1,666.4;  $p<.001$ ; see Figure 1B). Further, while nearly half of the  
133 patients (17) reported a sensation similar to that of having had a strong nasal douche,  
134 only a single control participant reported such a sensation (1 (3%); odds ratio, 32.3;  
135 95% CI, 4.3-32.3;  $p<.001$ ; see Figure 1B).

136

137

-----

138

Figure 1

139

-----

140

141 **Figure 1 (legend). Distribution of subjective "nasal" symptoms in each group, and**  
142 **correlations between nasal and other symptoms.** The clinical and control groups  
143 differed statistically in (A) the presence of nasal symptoms in general. (B) The 2 groups  
144 also differed in their subjective perception of three different "nasal" symptoms: Some  
145 nasal disturbances, nose dryness, and nasal douche sensation. (C) Co-occurrence  
146 matrices of symptoms for the clinical group (COVID-19). LowFev=Low grade fever;  
147 DryCgh=Dry cough; RespDf=Respiratory difficulties; SrThrt=Sore throat;  
148 NslCng=Nasal congestion; HedAch=Headache; Fatigu=Fatigue; Diarrh=Diarrhea;  
149 Anosmi=Anosmia; Ageusi=Ageusia; Smdstr=Some disturbances; NasDry=Nasal  
150 Dryness; NasFl=Nasal Flush.

151



Running head: ACUTE NASAL DRYNESS IN COVID-19

152 The nasal symptoms reported by the patients tended to co-occur mostly with  
153 anosmia/hyposmia, and ageusia/hypogeusia (see Figure 1C), appeared before or during  
154 (but not after) other symptoms of COVID-19 ( $\chi^2= 15.55$ ,  $df=3$ ,  $p<.01$ ), and lasted for  
155 about 12.05 days in patients versus 5 days in controls ( $p=.04$ ), on average (95% CI of  
156 the difference=3.9-10.18). It is worth highlighting that 85.3% and 79.4% of the patients  
157 with COVID-19 reported smell and taste loss, respectively, to some extent, in line with  
158 recent literature (see Brann et al., 2020; Lechien et al., 2020; Moein et al., 2020; Spinato  
159 et al., 2020).

160

## 161 **Discussion**

162 The pattern of results reveals an abnormal presence of subjective nasal symptoms in a  
163 group of patients who tested positive for COVID-19. While the presence of these  
164 sensations are likely irrelevant with respect to patient outcome (though some patients  
165 described them as extremely annoying), the early presence of these symptoms and the  
166 fact that they are clearly distinguishable from the loss of smell and taste previously  
167 reported in the literature (e.g., Spinato et al., 2020) highlight the potential importance of  
168 their use when exploring protocols for COVID-19. It is, however, plausible that all  
169 nasal and olfactory manifestations of the illness have related etiologies (i.e., impairment  
170 of epithelial cells that express ACE-2), as sudden changes in mucus density (due to the  
171 impairment of nasal goblet cells) not only induce nasal dryness (Hildenbrand et al.,  
172 2011), but also compromise the final adherence of the volatile chemical compounds to  
173 their corresponding odorant receptors (see Hummel, 2016). The presence of these nasal  
174 sensations could be taken into account for both diagnostic and social distancing  
175 purposes, especially in those situations in which RT-PCR tests cannot be administered  
176 to non-severe cases.

Running head: ACUTE NASAL DRYNESS IN COVID-19

177 A possible limitation of the present study is the possibility of having false COVID-19  
178 negative participants in the control group. It is worth mentioning that any study that  
179 tests only for patients might result in a false-negative proportion, but given the  
180 seroprevalence in the Spanish population (5%) at the time of this study, this might  
181 imply the addition of roughly 8-9 more participants with positive result in PCR test in  
182 our full sample, or 1-2 in the subsample, which would not alter the results significantly.  
183 Considering that nasal dryness could easily be related to some initial damage caused by  
184 SARS-CoV-2, future studies might determine the point in time where patients  
185 experiencing abnormal nasal dryness begin to develop other COVID-19 symptoms.

186

187

188 **Acknowledgments**

189 We would like to thank all of the participants that volunteered to answer the survey used  
190 to obtain the data reported in the present study.

191 **References**

- 192 Baig AM, Khaleeq A, Ali U, Syeda H. Evidence of the COVID-19 virus targeting the  
193 CNS: Tissue distribution, host–virus interaction, and proposed neurotropic  
194 mechanisms. *ACS Chem Neurosci*. 2020;11(7):995-998. doi:  
195 10.1021/acscchemneuro.0c00122.
- 196 Brann DH, Tsukahara T, Weinreb C, et al. Non-neuronal expression of SARS-CoV-2  
197 entry genes in the olfactory system suggests mechanisms underlying COVID-19-  
198 associated anosmia. *BioRxiv*; 2020. DOI: 10.1101/2020.03.25.009084.
- 199 Goodman LA. Snowball Sampling. *Ann Math Statist*. 1961;32(1):148–170.  
200 doi:10.1214/aoms/1177705148
- 201 Hildenbrand T1, Weber RK, Brehmer D. Rhinitis sicca, dry nose and atrophic rhinitis: a  
202 review of the literature. *Eur Arch Otorhinolaryngol* 2011; **268**: 17-26.  
203 doi:10.1007/s00405-010-1391-z
- 204 Hummel T, Whitcroft KL, Andrews P et al. Causes and classification of olfactory  
205 loss. Position paper on olfactory dysfunction. *Rhinology* 2016; **54**: 6-10.
- 206 Kim GU, Kim MJ, Ra SH, Lee J, Bae S, Jung J, Kim SH. Clinical characteristics of  
207 asymptomatic and symptomatic patients with mild COVID-19. *Clin Microbiol*  
208 *Infect*. 2020;26(7):948.e1-948.e3. doi: 10.1016/j.cmi.2020.04.040
- 209 Lechien JR, Chiesa-Estomba CM, De Sisti DR, et al. Olfactory and gustatory  
210 dysfunctions as a clinical presentation of mild to moderate forms of the  
211 coronavirus disease (COVID-19): A multicenter European study. *Eur Arch*  
212 *Otorhinolaryngol*. 2020. doi: 10.1007/s00405-020-05965-1
- 213 Mao L, Jin H, Wang M, et al. Neurologic manifestations of hospitalized patients with  
214 coronavirus disease 2019 in Wuhan, China. *JAMA Neurol*. 2020;e201127.  
215 doi:10.1001/jamaneurol.2020.1127

Running head: ACUTE NASAL DRYNESS IN COVID-19

- 216 Moein ST, Hashemian SMR, Mansourafshar B, Khorram-Tousi A, Tabarsi P, Doty RL.  
217 Smell dysfunction: a biomarker for COVID-19. *Int Forum Allergy Rhinol*.  
218 2020;10.1002/alr.22587. doi:10.1002/alr.22587
- 219 Spinato G, Fabbris C, Polesel J, et al. Alterations in smell or taste in mildly  
220 symptomatic outpatients with SARS-CoV-2 infection. *JAMA*. 2020;323(20):2089–  
221 2090. doi:10.1001/jama.2020.6771
- 222 Sungnak W, Huang N, Bécavin C, et al. SARS-CoV-2 entry factors are highly  
223 expressed in nasal epithelial cells together with innate immune genes. *Nat Med*.  
224 2020;26(5):681–687. doi:10.1038/s41591-020-0868-6
- 225 Wan Y, Shang J, Graham R, Baric RS, Li F. Receptor recognition by the novel  
226 coronavirus from Wuhan: an analysis based on decade-long structural studies of  
227 SARS coronavirus. *J Virol*. 2020;94(7):e00127–20. doi:10.1128/JVI.00127-20
- 228 Ziegler CGK, Allon SJ, Nyquist SK, et al. SARS-CoV-2 Receptor ACE2 is an  
229 interferon-stimulated gene in human airway epithelial cells and is detected in  
230 specific cell subsets across tissues. *Cell*. 2020;181(5):1016–1035.e19.  
231 doi:10.1016/j.cell.2020.04.035

Running head: ACUTE NASAL DRYNESS IN COVID-19

232 **Figure 1**

233

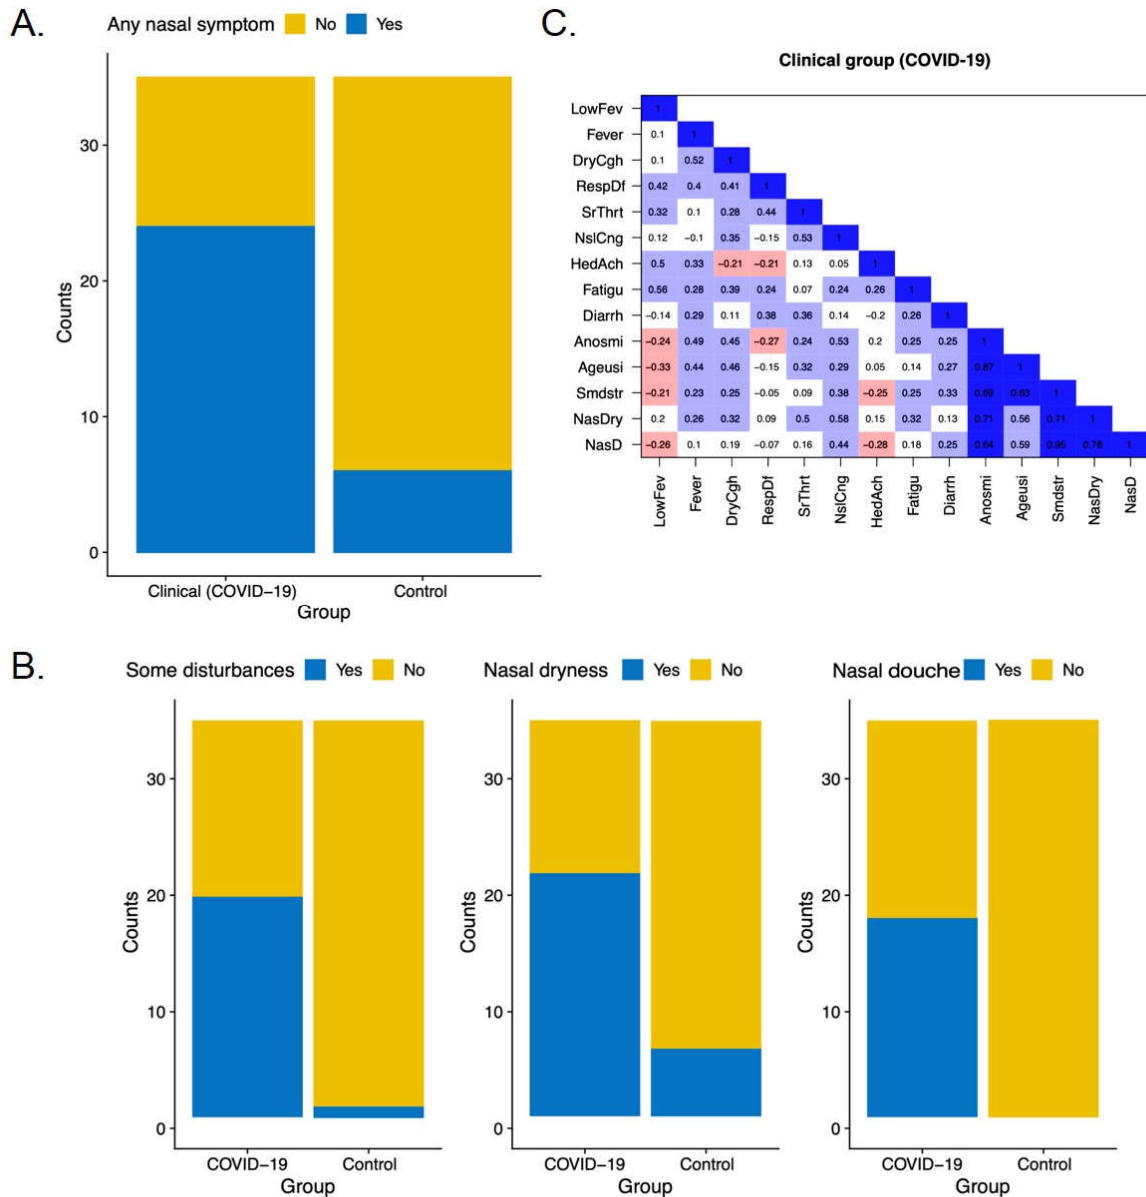

Source: https://medrxiv.org/content/medrxiv/early/2020/11/19/2020.11.18.20233874.full.pdf
